# Supplementary material
Source: MDPI journal article supplement (https://www.mdpi.com/2073-445X/11/11/2055)
Supplement: s1 [file s1]

## Supplementary Material S1 – ES list for each assessment method

Table S1 - ES list for ES mapping and assessment method

| ES Category  | ES                                                                                 |
|--------------|------------------------------------------------------------------------------------|
| Provisioning | Crops                                                                              |
|              | Forage, pasture                                                                    |
|              | Game/fish                                                                          |
|              | Raw materials (timber, fiber)                                                      |
|              | Wild fruits                                                                        |
|              | Medical plants                                                                     |
|              | Genetic resources                                                                  |
|              | Drinking water                                                                     |
| Regulating   | Carbon sequestration                                                               |
|              | Air purification                                                                   |
|              | Water flow regulation                                                              |
|              | Water purification                                                                 |
|              | Floods control                                                                     |
|              | Pollination and seed dispersal                                                     |
|              | Pests control                                                                      |
|              | Habitat for diversity                                                              |
| Cultural     | Landscape aesthetic                                                                |
|              | Recreational value                                                                 |
|              | Inspiration for culture, arts, educational and spiritual values, sense of identity |

Table S2 – ES list for experts-based assessment method

| ES Category  | ES                                                                                 |
|--------------|------------------------------------------------------------------------------------|
| Provisioning | Agricultural products                                                              |
|              | Raw materials (timber, fiber)                                                      |
|              | Wild fruits                                                                        |
|              | Water resources                                                                    |
| Regulating   | Carbon sequestration                                                               |
|              | Air purification                                                                   |
|              | Water flow regulation                                                              |
|              | Water purification                                                                 |
|              | Water purification                                                                 |
|              | Floods control                                                                     |
|              | Noise pollution                                                                    |
|              | Extreme events mitigation                                                          |
|              | Pollination and seed dispersal                                                     |
|              | Habitat for biodiversity                                                           |
| Cultural     | Landscape aesthetic                                                                |
|              | Recreational value                                                                 |
|              | Inspiration for culture, arts, educational and spiritual values, sense of identity |

Table S3 - ES list for residents' perception method

| ES Category  | ES                    |
|--------------|-----------------------|
| Provisioning | Economic value        |
| Regulating   | Biodiversity value    |
|              | Life sustaining value |
| Cultural     | Aesthetic value       |
|              | Cultural value        |

| ES Category | ES                |
|-------------|-------------------|
|             | Future value      |
|             | Historic value    |
|             | Intrinsic value   |
|             | Learning value    |
|             | Recreation value  |
|             | Spiritual value   |
|             | Therapeutic value |

## Supplementary Material S2—Questionnaire used in experts-based analysis

General information (Age; Gender; Education)

### Questions

1) On the basis of your experience and the information acquired before and during the workshop, please indicate the relevance (from 1 - very low to 5 - very high) of each ecosystem service connected to the Agricultural Park area at present (in the case of who cannot attribute importance to ecosystem service, write "NS - I don't know").

| ES Category  | ES                             | Description                                                                                       | Relevance<br>(from 1 – very low a 5 – very high; IDK – I don't know) |
|--------------|--------------------------------|---------------------------------------------------------------------------------------------------|----------------------------------------------------------------------|
| Provisioning | Agricultural products          | Vegetables, fruit and farm products from agricultural land in the Park                            |                                                                      |
|              | Raw materials (timber, fiber)  | Wood products for work or for energy use from the Park's land                                     |                                                                      |
|              | Wild fruits                    | Wild fruits, medicinal plants, etc. present in the Park                                           |                                                                      |
|              | Water resources                | Presence in the Park of springs and water basins for drinking, irrigation, industrial use, etc.   |                                                                      |
| Regulating   | Carbon sequestration           | Carbon sequestration by the Park vegetation                                                       |                                                                      |
|              | Air purification               | Urban temperature regulation                                                                      |                                                                      |
|              | Water flow regulation          | The soil and vegetation of the Park allow rainwater to infiltrate, regulating runoff and flooding |                                                                      |
|              | Water purification             | Purification of waste water and fixation of nutrients by the green areas of the Park              |                                                                      |
|              | Water purification             |                                                                                                   |                                                                      |
|              | Floods control                 | The park allows for the reduction of erosion related to water and wind                            |                                                                      |
|              | Noise pollution                | Reduction of noise pollution by the Park vegetation                                               |                                                                      |
|              | Extreme events mitigation      | The Park prevents the negative effects of extreme events (e.g. thunderstorms, floods, heat waves) |                                                                      |
|              | Pollination and seed dispersal | The Park area provides habitats for birds, insects including pollinators                          |                                                                      |
|              | Habitat for biodiversity       | The Park provides habitats for birds and other animals                                            |                                                                      |
| Cultural     | Landscape aesthetic            | The park provides opportunities                                                                   |                                                                      |

|  |                                                                                    |                                                                                              |  |
|--|------------------------------------------------------------------------------------|----------------------------------------------------------------------------------------------|--|
|  |                                                                                    | for outdoor recreation and recreation in contact with nature                                 |  |
|  | Recreational value                                                                 | The park provides opportunities for outdoor recreation and recreation in contact with nature |  |
|  | Inspiration for culture, arts, educational and spiritual values, sense of identity | The park offers the opportunity to enjoy the aesthetic value of the landscape                |  |

2) For the 3 ecosystem services that you consider most important among those identified above, would you be able to indicate who contributes to providing them, who benefits from them (both directly and indirectly) and what or who can hinder or reduce their supply?

3) Could you locate on the map of the Casal del Marmo area where these 3 important ecosystem services originate, so which portion of the Agricultural Park are they associated with? (draw a circle on the map and inside it the number of the corresponding ecosystem service)?

### Supplementary Material S3—Questionnaire used in residents' perception analysis

General information (Age; Gender; Education, Job, Marital status, Income)

#### Questions

1) We would like to know which values of the Casal del Marmo Agricultural Park area are important to you. Imagine having 100 euros (N.B. not real money) to save the social and cultural values of the Agricultural Park, how would you spend them? (among the 12 values below you can choose to spend 100 euros on a single value and 0 euros on the others or divide the expense between the different values; their final sum must in any case be 100 euros)

| ES Category  | ES                    | Description                                                                                                                                                       | Expenditure |
|--------------|-----------------------|-------------------------------------------------------------------------------------------------------------------------------------------------------------------|-------------|
| Provisioning | Economic value        | The area is important to me because it provides opportunities for economic development for the entire municipality (e.g. agriculture, tourism, etc.)              |             |
| Regulating   | Biodiversity value    | The area is important to me because it supports the life of many plants and animals                                                                               |             |
|              | Life sustaining value | The area is important to me because it helps purify the air and water and keep it fertile                                                                         |             |
| Cultural     | Aesthetic value       | The area is important to me because I can enjoy a beautiful view and pleasant sounds and smells                                                                   |             |
|              | Cultural value        | The area is important to me because it is a place to pass on and keep alive ancient knowledge and traditions                                                      |             |
|              | Future value          | The area is important to me because it is a heritage for future generations                                                                                       |             |
|              | Historic value        | The area is important to me because it presents places and things of historical interest for the entire city                                                      |             |
|              | Intrinsic value       | The area is important to me regardless of everything else (e.g. the presence of people, etc.)                                                                     |             |
|              | Learning value        | The area is important to me because it offers the opportunity to learn about the environment and agricultural activities through observation or direct experience |             |
|              | Recreation value      | The area is important to me because it is a place where I can carry out outdoor recreational activities                                                           |             |
|              | Spiritual value       | The area is important to me because it is a spiritually special place and because it instills a sense of respect and veneration for the environment               |             |
|              | Therapeutic value     | The area is important to me because it is a place that makes me feel better physically and mentally                                                               |             |

2) Compared to the most important values you chose in the previous question, can you indicate on the map the places where the three most important values for you are present?
